# Supplementary material
Source: PubMed Central journal article supplement (PMC5423086)
Supplement: cmi201592x1.pdf [file cmi201592x1.pdf]

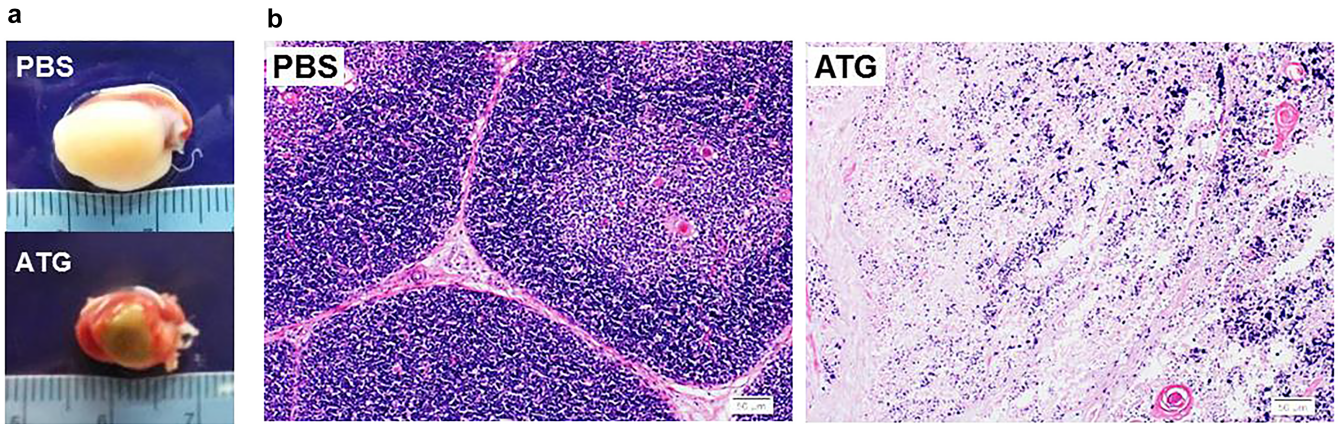

**Supplementary Figure S1** Depletion of human thymocytes by ATG in humanized mice. Humanized mice were prepared by transplantation of human fetal thymus and CD34+ cells, and 13 weeks later injected i.v. with ATG-G (3 mg kg per injection at day 0 and day 2, and 30 mg kg<sup>-1</sup> at day 4) or PBS (these are the same mice as shown in Figure 1). Shown are results of a representative human thymic graft analyzed 7 days after the last injection of ATG. **(a)** Macroscopic appearance. **(b)** Histology (hematoxylin and eosin).

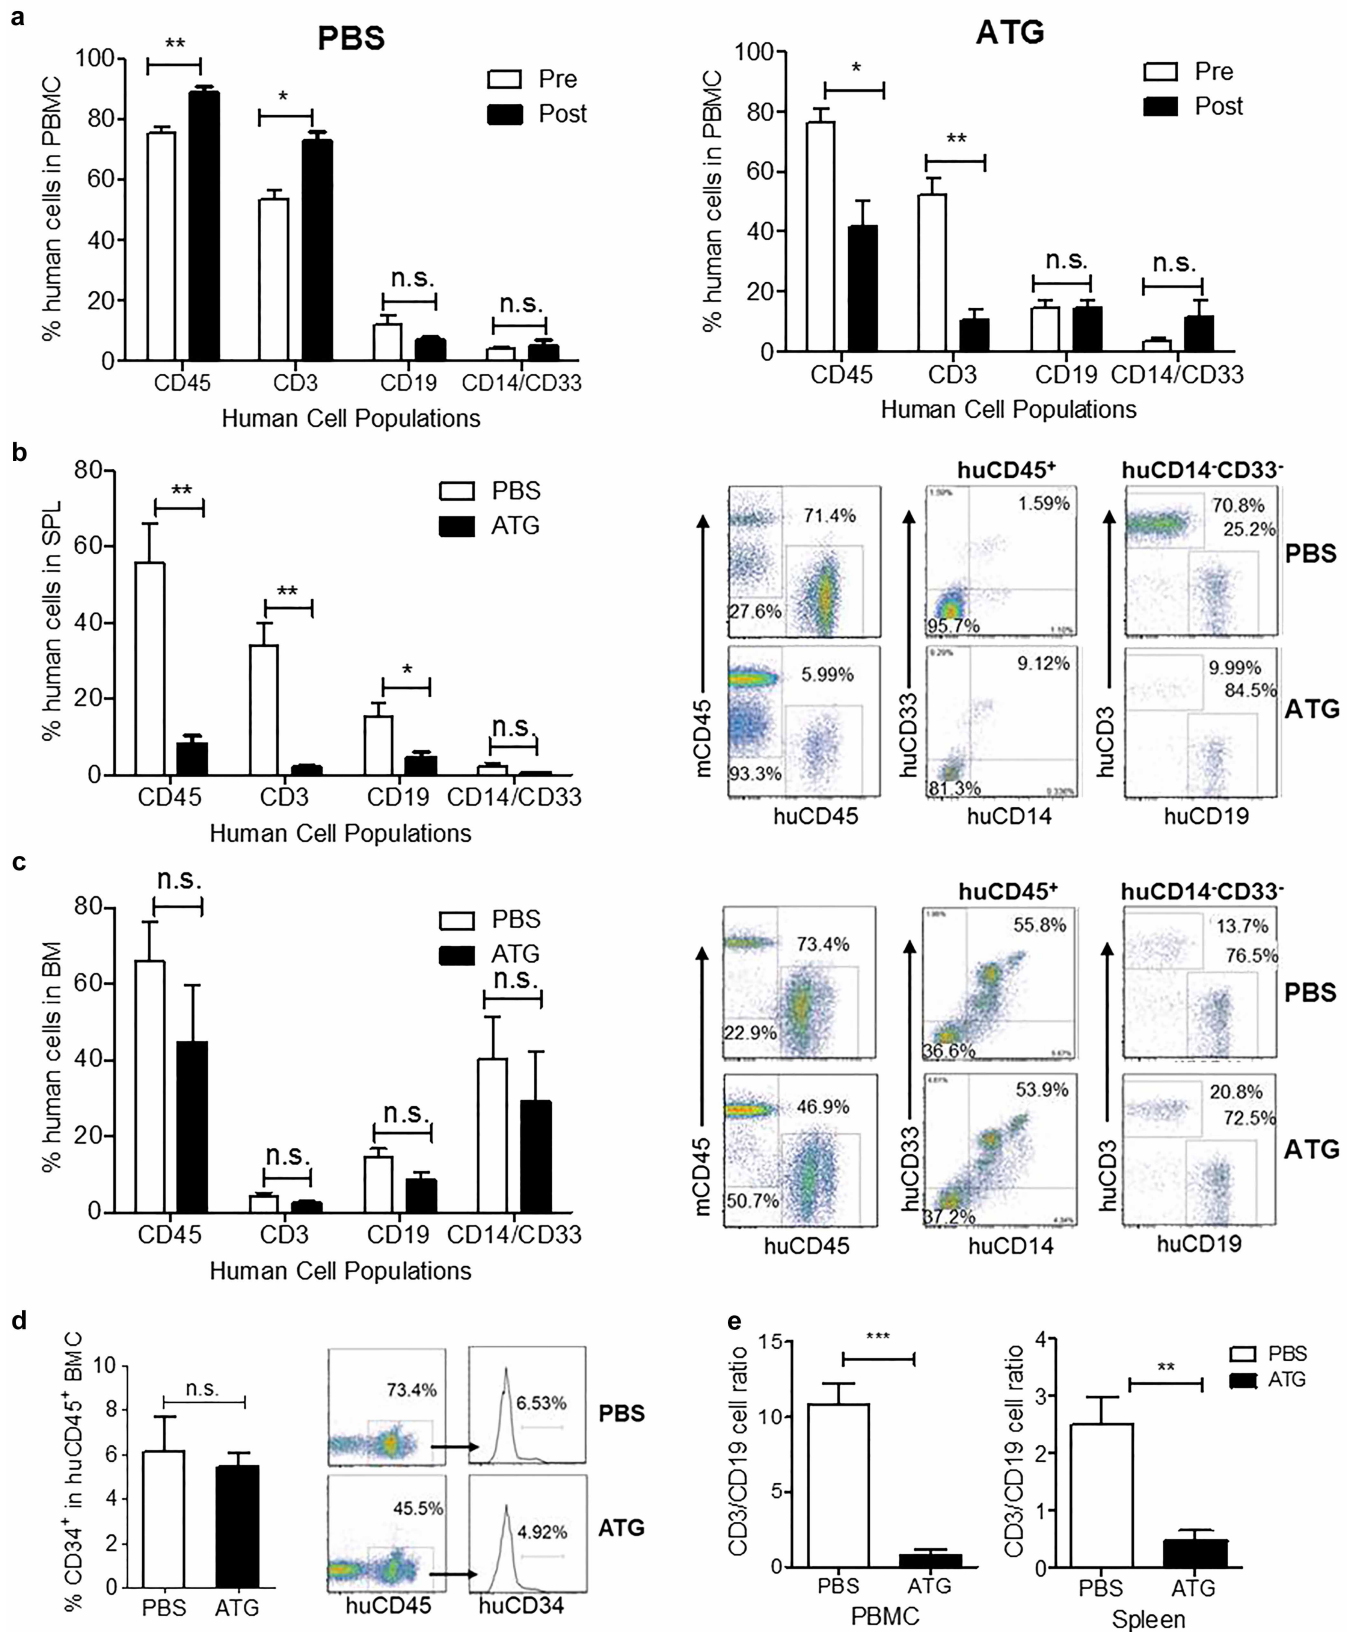

**Supplementary Figure S2** Comparison of human cell depletion in various tissues by ATG in humanized mice. Humanized mice were constructed by transplantation of human fetal thymus and CD34+ cells, and 17 weeks later received three injections i.v. of ATG-F (3 mg kg per injection at day 0 and day 2, and 30 mg kg<sup>-1</sup> at day 4) or PBS. **(a)** Levels (%) of human CD45+, CD3+, and CD19+ cells in peripheral blood measured 10 days prior to the first injection and 7 days after last injection of ATG or PBS. **(b–d)** Levels (%) and FACS profiles of human CD45+, CD3+, CD19+, and CD14+CD33+ cells in the spleen **(b)** and bone marrow **(c)**, and of human CD34+ cells in bone marrow **(d)** measured 7 days after last injection of ATG or PBS. Data presented are mean ± SEMs (*n* = 4 per group). **(e)** Ratios of human CD3+ to CD19+ cells in PBMCs and spleen from PBS-injected and ATG-treated humanized mice. \**P* < 0.05; \*\**P* < 0.01; \*\*\**P* < 0.001. Similar results were obtained from another independent experiment (not shown).

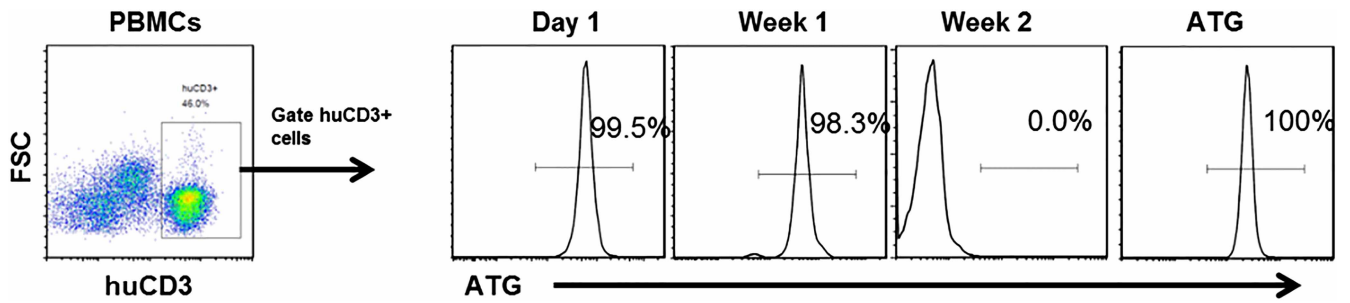

**Supplementary Figure S3** Biological activity of ATG in immunodeficient mice. NSG mice were treated with ATG-F ( $10 \text{ mg kg}^{-1}$ ,  $n = 4$ ), and sera were collected at day 1, week 1, and week 2 post-treatment for measuring ATG activity. Briefly, we incubated human PBMCs with serum samples collected at the indicated times or ATG (positive control), followed by staining with fluorochrome-conjugated goat anti-rabbit antibody, and ATG binding to human CD3+ cells was assessed by flow cytometry.



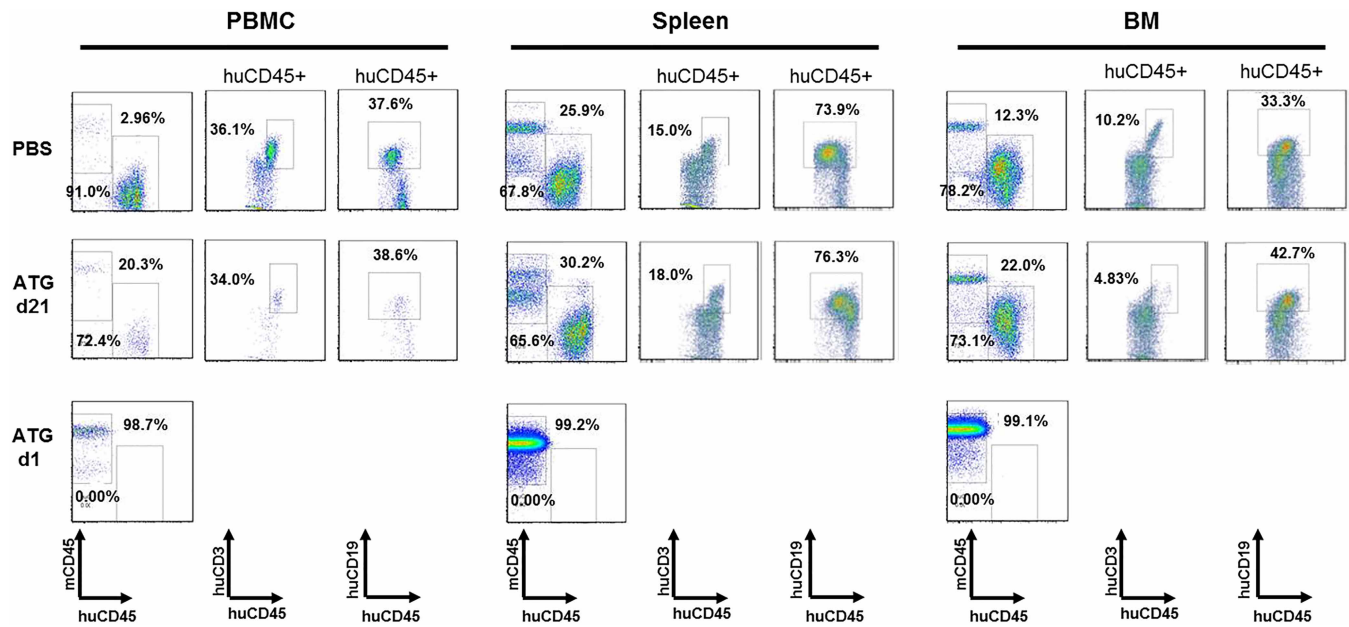

**Supplementary Figure S4** ATG depletes donor HSCs prior to their settling in the bone marrow. NSG mice were transplanted with human fetal thymus and CD34+ cells, followed 1 day later by injection i.v. of ATG-F (10 mg kg<sup>-1</sup>; ATG d1), or 21 days later by injection i.v. of ATG-F (30 mg kg<sup>-1</sup>; ATG d21) or PBS. Mice were killed 17 weeks after transplantation for measuring human chimerism. Shown are representative staining profiles of human CD45+ hematopoietic, CD3+ T, and CD19+ B cell chimerism in PBMCs, spleen, and bone marrow (BM) cells.
